# Supplementary figures and images for: Angiotensin‐converting enzyme inhibitor/angiotensin II receptor blocker treatment and haemodynamic factors are associated with increased cardiac mRNA expression of angiotensin‐converting enzyme 2 in patients with cardiovascular disease
Source: PubMed Central journal article supplement — Eur J Heart Fail. 2020 Oct 20;22(12):2248–57. doi: 10.1002/ejhf.2020 (PMC7675329; doi:10.1002/ejhf.2020), 2020-10-20

# Suppl. Figure 1

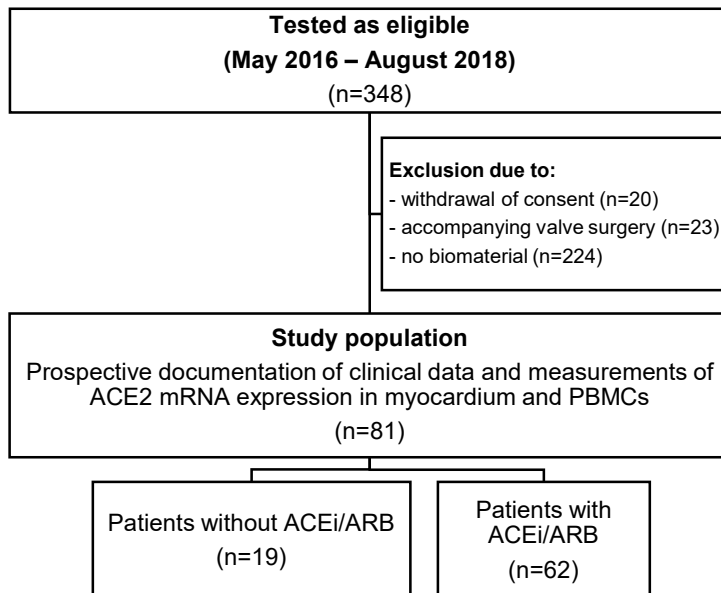

# Suppl. Figure 2

Median: 0.00053

## A Blood

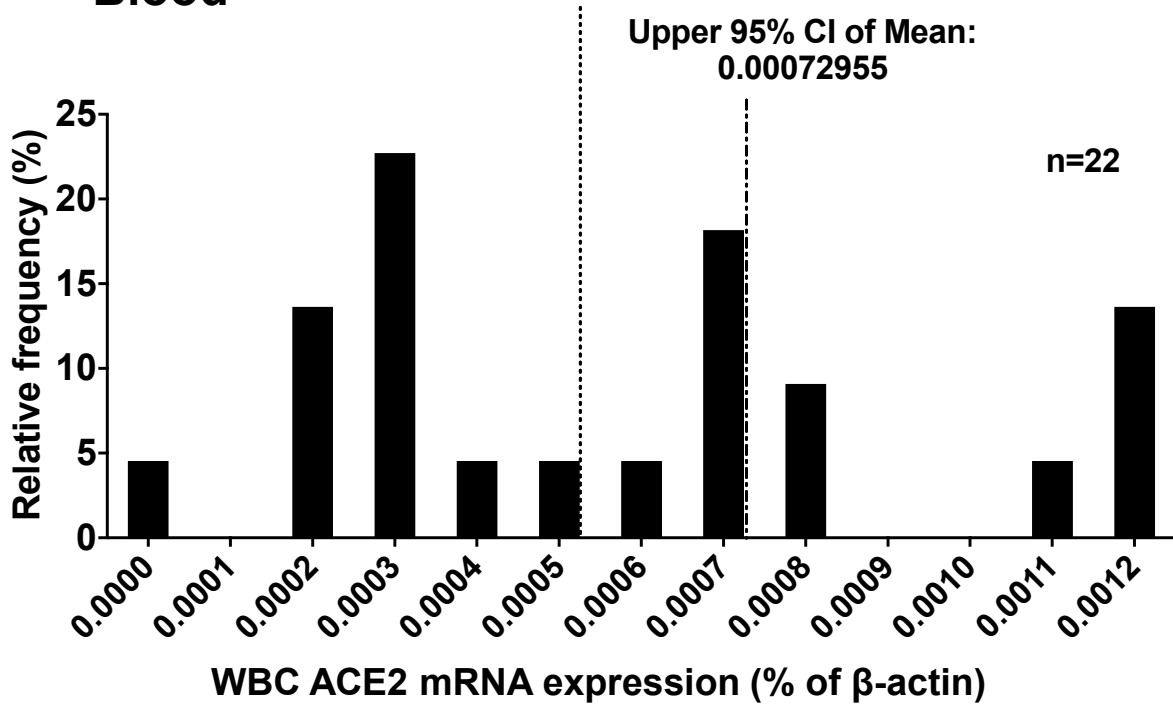

## B

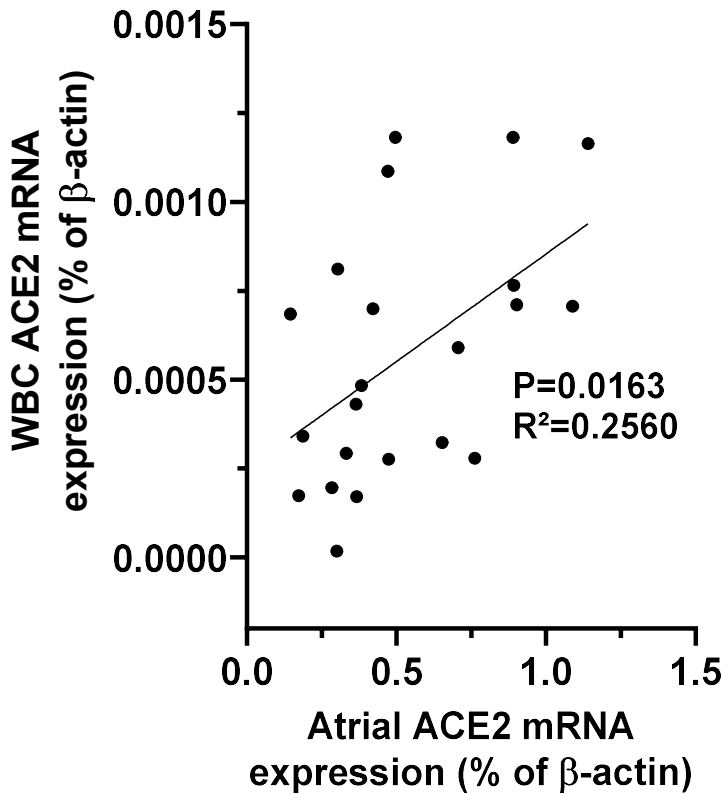

## C

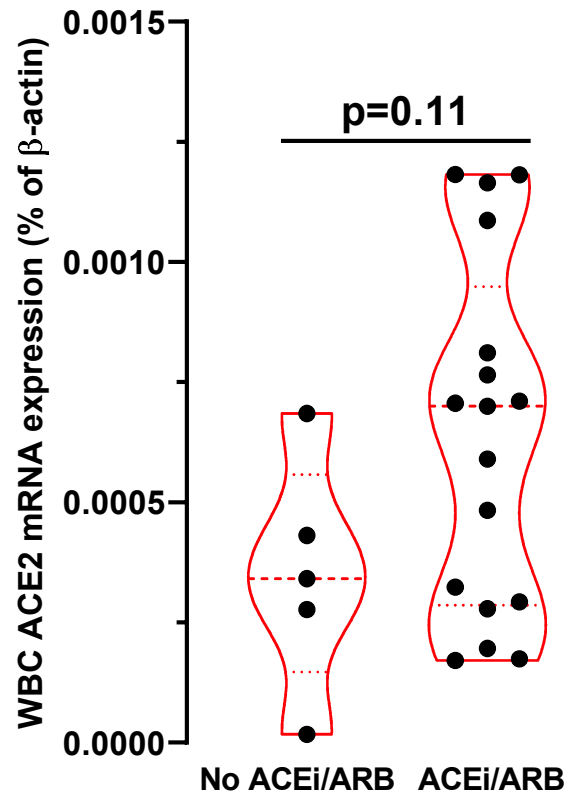

# Suppl. Figure 3

**A)**

**Atrium**

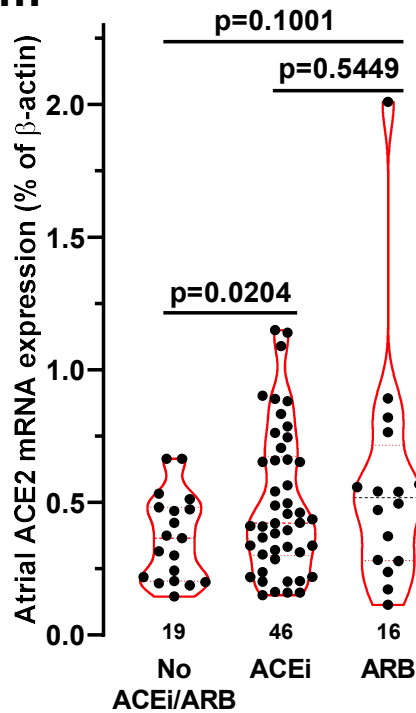

**B)**

**Ventricle**

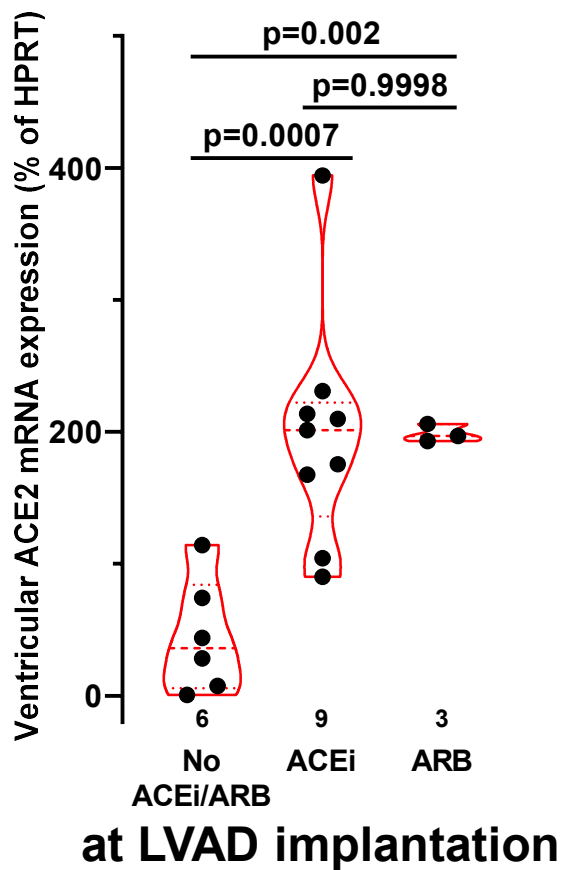

Supplement: EJHF-22-2248-s001.pdf [file EJHF-22-2248-s001.pdf]
